# Supplementary material
Source: Springer Nature journal article supplement (https://www.springermedizin.de/resource/supplementary/12874_2013_955_MOESM5_ESM.pdf/9433212)

EWMA  $\lambda = 0.02$  for expected mortality (5% increase), fixed control limits for raw mortality

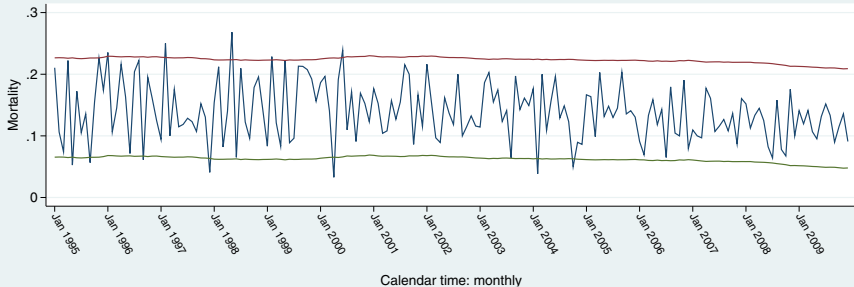

EWMA  $\lambda = 0.05$  for expected mortality (10% increase), fixed control limits for raw mortality

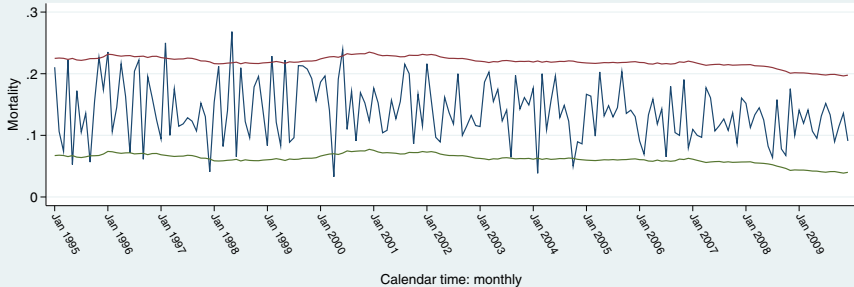

Supplement: MOESM5 [file 9433212]
